# Supplementary material
Source: publisher figshare collection journal article supplement (https://gsajournals.figshare.com/ndownloader/files/17710073)
Supplement: Supplementary file 1 [file 17710073]

## Sheet: all (2)
Table S3. Summary of validation of the mutation candidate using Sanger sequencing
Chromosome	Position	Mutant ID	Reference base	Variant base	Zygosity called by NGS	Allelic depths for reference alleles	Allelic depths for variant alleles	Overall depth of coverage	Vairant allele frequency (%)	IGV check	Sanger sequencing validation	Primer_foward	Primer_reverse
chr02	31808485	HTMI-154	G	GA	Heterozygous	16	7	23	30.4	ok	fault	ACCGGAAATGCATAGGAGTG	CAGCTGTAAGAGGTGAGCCC
chr01	14987318	HTM-I257	C	T	Heterozygous	16	7	23	30.4	ok	Heterozygous	TGGTTCTCAACATCGTCCAA	GTAGCCATTGTGGGAGGAGA
chr11	1027707	HTMG-353	T	G	Heterozygous	11	5	16	31.3	ok	fault	CCGTTTACTTTCCGTTGCAT	TGGTATTGCACGGAGGAAAT
chr09	17755213	HTMI-154	C	CA	Heterozygous	11	5	16	31.3	ok	fault	TGCTCTGCTTCTGCACTGAT	TTTACTGGTGAGACTCGGGG
chr12	6832092	HTM-I257	T	TA	Heterozygous	13	6	19	31.6	ok	fault	GTTGAAAGATGCGTTAGGGC	CTCCTCGAACAAAAACCCAA
chr08	21465320	HTMG-353	T	C	Heterozygous	8	4	12	33.3	ok	fault	CAAGGATGGAAATGCTTGGT	ATATGCACACGCACACCCTA
chr03	7116272	HTM-I257	TC	T	Heterozygous	8	4	12	33.3	ok	fault	CCCTTTTTCTTTCCTTTGCC	GCATATGCATGGCATTCAAG
chr12	7623022	HTM-I257	TTC	T	Heterozygous	8	4	12	33.3	ok	fault	TAGTTGCTAGAGGGGAGCGA	ATTGCAAAACATAGGGCCTG
chr07	10630090	HTMG-347	C	CA	Heterozygous	10	5	15	33.3	ok	fault	CAGTTGGCATCCATCTCCTT	TGGGGACAAATCGAGGATAG
chr11	21251227	HTM-I257	A	C	Heterozygous	9	5	14	35.7	ok	fault	TCAGTTTTTGCGCTCAGATG	GAAGAGGCCCATCGATAACA
chr02	2245683	HTMI-154	T	TA	Heterozygous	9	5	14	35.7	ok	Heterozygous	CGGTAGATTCTTGGATGGGA	CCTCTCCGACTTCTCCCTCT
chr06	23511251	HTM-I257	T	A	Heterozygous	7	4	11	36.4	ok	fault	CAATCCCTCTAGCTTCGCTG	TGTTGGAGTGTCAGAGCACC
chr09	18770523	HTMG-354	C	A	Heterozygous	6	4	10	40	ok	Heterozygous	CTGACCGACTTCGACCTCTC	GAACGAGAATGACCTCTCGC
chr05	17869329	HTMI-223	G	A	Heterozygous	9	6	15	40	ok	Heterozygous	GAGATCCCCTGGCATAGTGA	ATTCCAGCACATTTGCATCA
chr04	948617	HTMG-347	T	A	Heterozygous	29	20	49	40.8	ok	Heterozygous	CTCAGCCCAGCAAGCTTATC	ATACAAGCGAGGGGAATGTG
chr06	7942103	HTMG-354	C	T	Heterozygous	10	7	17	41.2	ok	Heterozygous	TCGAGAAATGGAGGAGCAGT	TAGTCGCGGTATAGCCCATC
chr08	428031	HTMI-226	T	A	Heterozygous	7	5	12	41.7	ok	Heterozygous	AATAAAGCTGCCGCAACCTA	ATTGTCGTGCCAATGTTTGA
chr06	22082533	HTMG-355	GT	G	Heterozygous	7	5	12	41.7	ok	Heterozygous	ACTTCCTGTTGATTCCCGGT	CCAAAACGAAACAACGTCCT
chr02	27551421	HTMI-154	A	T	Heterozygous	7	5	12	41.7	ok	Heterozygous	TAGTGCTGCAGAATGGTTGC	CAACACTTCCAGGACCCAGT
chr01	29806780	HTMG-354	G	GCTCTCT	Heterozygous	5	4	9	44.4	ok	fault	AACCAGCACAAGAAACCACC	TACCAATGGAGGCCTGAGTC
chr01	11546960	HTM-I257	C	T	Heterozygous	10	8	18	44.4	ok	Heterozygous	GGTGCATACATGACCACGAG	CTTGCTCTGGTTTTTCGGAC
chr01	12281507	HTMG-347	GA	G	Heterozygous	8	7	15	46.7	ok	Heterozygous	GGTCGATCCTGTTGGAGCTA	TCGAGAAATGTTCCCTCGTT
chr05	22515317	HTMI-226	GA	G	Heterozygous	9	8	17	47.1	ok	Heterozygous	TGAATCGGGTATGTAAACTTTTGA	CAGGACAATCATGCACGAAC
chr03	23788432	HTMG-351	G	A	Heterozygous	14	13	27	48.1	ok	Heterozygous	GAGCGCTGGTAGTCCTATGC	AAGGCCAGTCACTTGGAAGA
chr07	15994261	HTMI-218	C	G	Heterozygous	15	14	29	48.3	ok	Heterozygous	AGGCGTGCTGCTTAGTTTGT	GACGATCGGACTCCTCACTC
chr04	3528976	HTMI-226	T	A	Heterozygous	7	7	14	50	ok	Heterozygous	GTGCACAGTGCCTGTCAACT	AAACCGAGGCCAAATTTCTT
chr03	17488359	HTMG-347	C	CA	Heterozygous	5	6	11	54.5	ok	Heterozygous	GTGCTGTACAACGTCGAGGA	TGTTGTGTTGGGTGGAAGAA
chr05	23836594	HTMI-226	A	T	Heterozygous	10	12	22	54.5	ok	Heterozygous	CACCAAATGTGTAAACCCCC	GAAAAACGTGAGGGGAACAA
chr08	18926683	HTMG-353	T	C	Heterozygous	9	11	20	55	ok	Heterozygous	GGGGATCTAACCCATCGAAT	CAAAGCCATCATCAGCTTCA
chr03	22361907	HTMI-154	G	A	Heterozygous	9	11	20	55	ok	Heterozygous	TCATCACGATGCTTCTCTCG	CTGCATCACCCAAACCTTTT
chr12	25605011	HTMG-347	A	G	Heterozygous	4	6	10	60	ok	Heterozygous	CTGCTTTCCAAAGTTCCTGC	CTCCCTCCGTCCAATGTTTA
chr09	7634087	HTMI-154	G	A	Heterozygous	4	6	10	60	ok	Heterozygous	GCAAGGGCAAAATAGCAAAG	GTGATCGGACCGTAGATTG
chr12	7229635	HTMG-353	T	G	Heterozygous	7	13	20	65	ok	Heterozygous	TGCATGATCCGCATAAAAGA	ACCCATGAAGCCACATTACC
chr08	18578749	HTM-I257	C	T	Heterozygous	3	7	10	70	ok	Heterozygous	GGTTGAATCGGATATGGTGG	GGAGACAGGAAGAGAATGCG
chr08	26330780	HTM-I257	A	T	Heterozygous	6	15	21	71.4	ok	Heterozygous	GTCGGTTTGCAGATTCGTTT	AACGCAAGTTCACCATTTCC
chr03	15589387	HTM-I257	G	A	Heterozygous	2	5	7	71.4	ok	Heterozygous	GATGCTTGACCCTCGTGTTT	CTATGTGGCATCAATGTGGC
chr11	11808777	HTMG-353	C	T	Heterozygous	3	9	12	75	ok	Homozygous	CTACGGGTATCCTCCGTTGA	GGTGTGCCTTTTGGTCTTGT
chr07	5255768	HTMG-347	T	G	Heterozygous	3	9	12	75	ok	Homozygous	TGGTTTCCCTGCTAAGCTGT	GGTTAGATTCGGAGAGGGGA
chr07	17391443	HTMG-347	C	A	Heterozygous	3	9	12	75	ok	Homozygous	AACAGAGACGAGGGGGAGTT	AGATGACGCCATTACCAAGG
chr09	20058405	HTMI-221	AAACAGTT	A	Heterozygous	4	12	16	75	ok	Heterozygous	TTGGGCTGTTATATAGGGCG	GAATTGGGGATTCAAGCAGA
chr03	31782747	HTMG-354	A	C	Heterozygous	3	9	12	75	ok	Homozygous	AGAGAGTGGAAGAGAGGCCC	CTGCTCCAAGCAACCTTTTC
chr02	11600718	HTMG-348	C	CCTAT	Heterozygous	5	16	21	76.2	ok	Heterozygous	GATCAAATCAATCAGGCCGT	GCAACGTAAGTGCATAGCGA
chr06	3485044	HTMG-353	G	A	Heterozygous	3	10	13	76.9	ok	Homozygous	CAAGAACGCAATGCGACTAA	AGAGGGAGAGAGAGGGAACG
chr05	26464120	HTMG-348	G	T	Heterozygous	3	11	14	78.6	ok	Homozygous	GTAAACGTCGCGTTGAAGGT	GCTATCTTCGTGTGTGGGGT
chr02	20394679	HTMG-351	G	C	Heterozygous	2	8	10	80	ok	Homozygous	CCTATTCCCCCTTCCACATT	CTCTTTCCCCTGTCTTGCTG
chr09	15217377	HTMG-353	T	C	Heterozygous	2	9	11	81.8	ok	Homozygous	GGGGGAAAAGTCATTGTGTG	TGCCACTGCATTTTGAAGAG
chr01	10831311	HTMG-347	CGGAACGCG	C	Heterozygous	1	5	6	83.3	ok	Homozygous	CTCAACGTCCACATCGAGAA	GGCATGCTCATCACATCATC
chr01	2027970	HTMI-226	C	T	Heterozygous	2	10	12	83.3	ok	Homozygous	AAATTCGAAATTAAGAAAAACATGG	TTGACTTTAAACTCTTCTTCCCA
chr01	15191387	HTMG-353	TTCA	T	Heterozygous	2	11	13	84.6	ok	Homozygous	TGGGACTCACCCTATTCCAG	TCTCCACTTTTCTGCCGACT
chr02	1236214	HTMI-154	T	A	Heterozygous	2	12	14	85.7	ok	Homozygous	TTGGATACGCCAGTACCACA	CATGCATGTGGTCAACCATT
chr04	23262817	HTM-I257	C	CT	Heterozygous	2	13	15	86.7	ok	Homozygous	AAACTTGCAGCTCTTCTGCC	TGTCTAGCCCACAACCAAGA
chr12	24728725	HTM-I257	CCT	C	Heterozygous	1	10	11	90.9	ok	Homozygous	CATGGACGTTTGTTACGTCG	ATGTTTCCAAAGAACGGTCG
chr06	12998193	HTM-I257	G	A	Homozygous	2	23	25	92	ok	Homozygous	ATTTCACCGCTTGTTGGAAG	GTTGTGCACCACAAGATTGG
chr03	14824526	HTMG-353	T	C	Homozygous	0	6	6	100	ok	Homozygous	CGTAGTGCTTCCGGTGAAGT	TCGAATGGGATTTTCTGGAC
chr05	18205135	HTMG-353	CTCTG	C	Homozygous	0	16	16	100	ok	Homozygous	TACCTCAGCGGATGCTTTCT	AATGAAGGCCCTTGGAGTCT
chr01	2360480	HTMG-354	A	AT	Homozygous	0	11	11	100	ok	Homozygous	AAAGGTTAGGGTTTTCGGG	TCCTCTCCAAGAAGCGAAGA
chr12	17898303	HTMG-354	T	TA	Homozygous	0	11	11	100	ok	Homozygous	GCACCTGGATCGGAGTTTTA	CGGTTTTCACGACAGAGACA
chr04	21977762	HTM-I257	T	A	Homozygous	0	7	7	100	ok	Homozygous	TGCGGAACATGATAGCTCAG	CAGAGGGAGTGGCTGGTAAG
chr04	23157167	HTM-I257	G	C	Homozygous	0	26	26	100	ok	Homozygous	TGTCAACAAGTGCTGTGCAA	ATATTGCAGCCACGGTTTTC
chr04	23157170	HTM-I257	TAG	T	Homozygous	0	26	26	100	ok	Homozygous	TGTCAACAAGTGCTGTGCAA	GATATTGCAGCCACGGTTTT
chr09	12107038	HTM-I257	T	C	Homozygous	0	17	17	100	ok	Homozygous	GGGCTCACCACATTCACTCT	GCAATTTTGGATGGTCTCGT
chr09	12107039	HTM-I257	A	G	Homozygous	0	17	17	100	ok	Homozygous	GGGCTCACCACATTCACTCT	GTCAGGGCCACTTCAAGGTA
chr06	13129608	HTMI-226	AC	A	Homozygous	0	12	12	100	ok	Homozygous	GAAACGAGATGCACGCTGTA	TGTTTAGGGCTTGTTCGGTT
chr06	26419279	HTMI-226	A	AT	Homozygous	0	13	13	100	ok	Homozygous	CAGTCTGCACAGAAAACGGA	TACTAATCCCCTCCCAACCC
chr07	3855324	HTMI-226	G	T	Homozygous	0	21	21	100	ok	Homozygous	GGCCAAAGTTCAGAATCCAA	AGTTCCAAGCTGGAAACGAA
chr01	42254297	HTMI-154	C	T	Homozygous	0	19	19	100	ok	Homozygous	GGCTGCCTTAAGTCTGCATC	CCCCTGCACTCTCTTCCTTA
chr02	30594148	HTMI-154	T	G	Homozygous	0	11	11	100	ok	Homozygous	CAGCTAGCGGACCAAGTACC	AGAAAACAGCATTCGCCATT
chr05	28998944	HTMI-154	CGATTGCTACAAATG	C	Homozygous	0	16	16	100	ok	Homozygous	CCCAATACGACTCAAGCCAT	ACTCGACTGTGGAACGAAGG
chr12	21605968	HTMI-154	G	A	Homozygous	0	13	13	100	ok	Homozygous	CGACTCGTGAAGCACAACAT	GCAGTGGTTGATTCGAGGAT
